# Supplementary material
Source: PubMed Central journal article supplement (PMC3758162)
Supplement: f-69-01052-sup1.pdf [file f-69-01052-sup1.pdf]

**HigB2:**

MGSSHHHHHSSGLVPRGSHMKSVFVESTIFEKYRDEYLSDEEYRLFQAELMLNPKLGDVVIQGTGGLRKIR  
VASKGKGKRGGSRIIYYFLDEKRRFYLLTIYGKNEMSDLNANQRKQLMAFMEAWRNEQS

**HigA2:**

MSNRDLFAELSSALVEAKQHSEGKLTLLKTHHVNDVGELNISPDEIVSIREQFNMSRGVVFARLLHTSSRTLE  
NWEQGRSVPNGQAVTLLKLVQRHPETLSHIAEL

**Supplementary Figure S1.** Amino acid sequences of the proteins used in this study. Wild-type amino acids are shown in black while the N-terminal tag of HigB2 is shown in red.

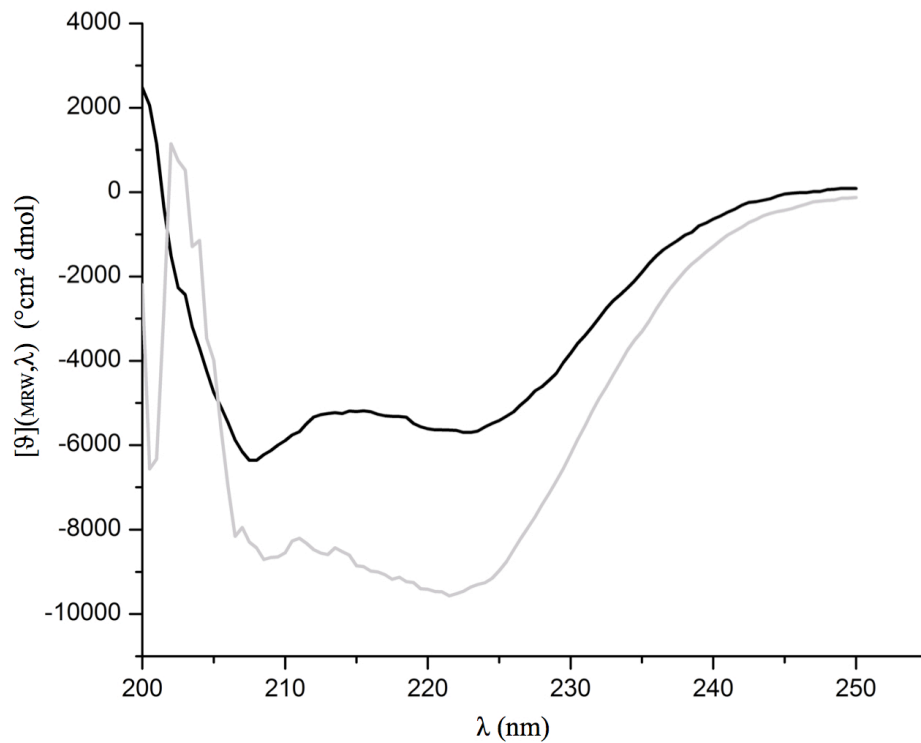

**Supplementary Figure S2.** CD spectra of purified antitoxin HigA2 (black line) and toxin HigB2 (gray line). Spectra were measured with a protein concentration of 0.5 mg/ml in 5 mM TRIS-HCl pH 8.0, 100 mM NaCl and are reminiscent of folded proteins.
